# Supplementary material for: Mitigating Racial Bias in Health Care Algorithms: Improving Fairness in Access to Supportive Housing
Source: Atypon-hosted journal article supplement (doi:10.1176/appi.ps.20230359), 2024-06-28

**FIGURE:** Overview of the iterative process and outcomes in developing algorithm fairness for eligibility for the CHES Program

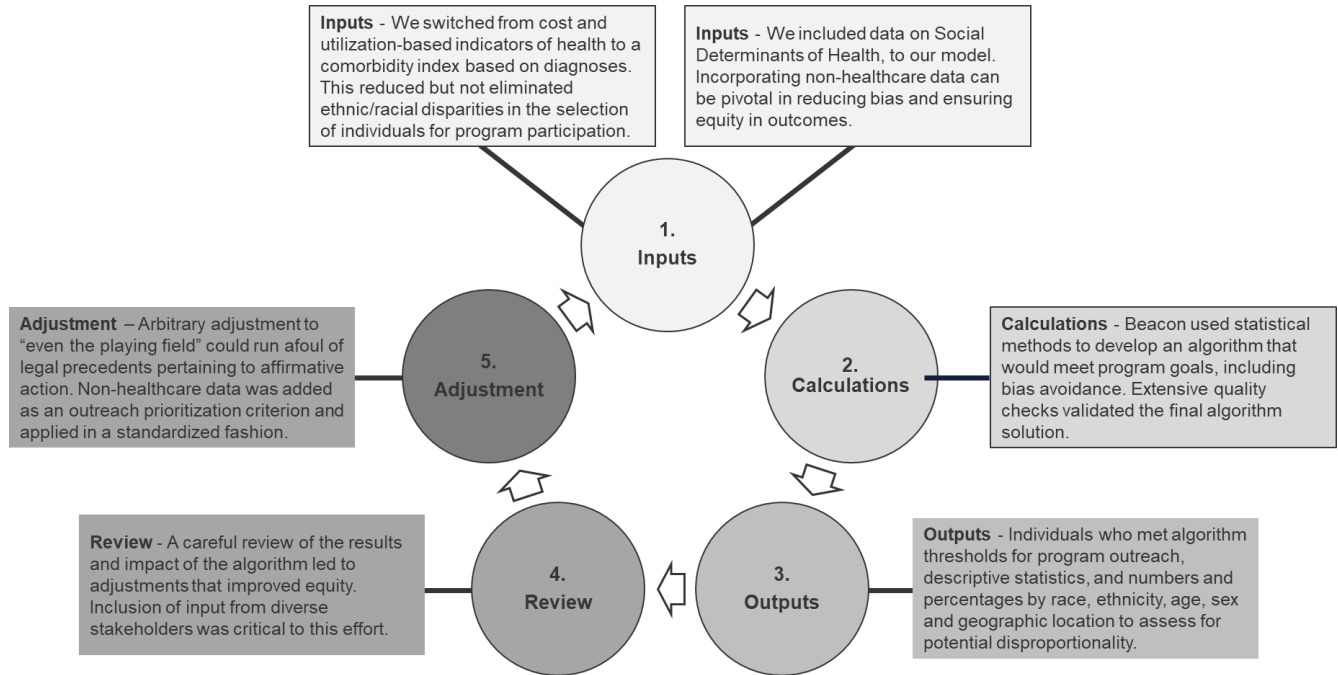

Supplement: appi.ps.20230359.ds001.pdf [file appi.ps.20230359.ds001.pdf]
